# Supplementary material
Source: Elsevier journal article supplement (https://www.sciencedirect.com/science/article/pii/S0001731023001734)
Supplement: mmc1 [file S0001731023001734:mmc1.pdf]

## Supplementary Results. Supplementary Tables

### Supplementary Table SI

**Current symptoms and areas affected, overall and by physician-judged disease severity at sampling (Analysis 1).**

| Characteristic                                   | Physician-judged severity (Analysis 1) |                 |                               |
|--------------------------------------------------|----------------------------------------|-----------------|-------------------------------|
|                                                  | Overall<br>(N=378)                     | Mild<br>(N=318) | Moderate to severe<br>(N=60)* |
| <b>Number of current symptoms, mean±SD</b>       | 3.6±3.2                                | 3.1±2.8         | 5.7±4.1                       |
| <b>Number of symptoms, n (%)</b>                 |                                        |                 |                               |
| Scaling/flaking                                  | 246 (65.1)                             | 198 (62.3)      | 48 (80.0)                     |
| Itching                                          | 209 (55.3)                             | 162 (50.9)      | 47 (78.3)                     |
| Red inflamed skin                                | 204 (54.0)                             | 160 (50.3)      | 44 (73.3)                     |
| Redness/discolouration                           | 134 (35.4)                             | 108 (34.0)      | 26 (43.3)                     |
| Burning                                          | 103 (27.2)                             | 71 (22.3)       | 32 (53.3)                     |
| Cracked skin                                     | 88 (23.3)                              | 66 (20.8)       | 22 (36.7)                     |
| Tender/painful skin                              | 67 (17.7)                              | 47 (14.8)       | 20 (33.3)                     |
| Stinging                                         | 65 (17.2)                              | 48 (15.1)       | 17 (28.3)                     |
| Tightness                                        | 60 (15.9)                              | 42 (13.2)       | 18 (30.0)                     |
| Nail pitting or deformation                      | 36 ( 9.5)                              | 24 (7.5)        | 12 (20.0)                     |
| <b>Number of current areas affected, mean±SD</b> | 1.7±1.9                                | 1.3±1.4         | 3.7±2.7                       |
| <b>Number of areas affected, n (%)</b>           |                                        |                 |                               |
| Knees                                            | 107 (28.3)                             | 78 (24.5)       | 29 (48.3)                     |
| Scalp                                            | 97 (25.7)                              | 76 (23.9)       | 21 (35.0)                     |
| Elbows                                           | 85 (22.5)                              | 58 (18.2)       | 27 (45.0)                     |
| Legs                                             | 62 (16.4)                              | 38 (11.9)       | 24 (40.0)                     |
| Back                                             | 51 (13.5)                              | 25 (7.9)        | 26 (43.3)                     |
| Chest                                            | 43 (11.4)                              | 29 (9.1)        | 14 (23.3)                     |
| Buttocks                                         | 33 (8.7)                               | 15 (4.7)        | 18 (30.0)                     |
| Arms                                             | 31 (8.2)                               | 15 (4.7)        | 16 (26.7)                     |
| Groin or genitals                                | 30 (7.9)                               | 17 (5.3)        | 13 (21.7)                     |
| Nails                                            | 21 (5.6)                               | 14 (4.4)        | 7 (11.7)                      |

\*Only two patients had severe disease at sampling. Only the 10 most common symptoms and areas affected are displayed. N, total number of patients per group; n, number of patients with outcome; SD, standard deviation.

## Supplementary Table SII

**Table SII: Clinical characteristics of the subset of patients not experiencing a flare at sampling, overall and by physician-judged disease severity at sampling (Analysis 1).**

| Characteristic                                   | Physician-judged severity (Analysis 1) |                 |                               |
|--------------------------------------------------|----------------------------------------|-----------------|-------------------------------|
|                                                  | Total<br>(N=360)                       | Mild<br>(N=308) | Moderate to severe<br>(N=52)* |
| <b>BSA %, mean±SD</b>                            | 3.4±4.9                                | 2.6±4.1         | 7.9±6.2                       |
| <b>PASI, mean±SD</b>                             | 4.3±8.9                                | 3.4±8.8         | 9.1±7.8                       |
| <b>Current PGA score, N (%)</b>                  |                                        |                 |                               |
| <b>PGA 0–1</b>                                   | 227 (63.1)                             | 221 (71.8)      | 46 (88.5)                     |
| <b>PGA 2–4</b>                                   | 133 (36.9)                             | 87 (28.2)       | 46 (88.5)                     |
| <b>Number of current symptoms, mean±SD</b>       | 3.5±3.2                                | 3.1±2.8         | 5.7±4.3                       |
| <b>Type of current symptoms, n (%)</b>           |                                        |                 |                               |
| Scaling/flaking                                  | 229 (63.6)                             | 188 (61.0)      | 41 (78.8)                     |
| Itching                                          | 192 (53.3)                             | 153 (49.7)      | 39 (75.0)                     |
| Red inflamed skin                                | 190 (52.8)                             | 152 (49.4)      | 38 (73.1)                     |
| Redness/discoloration                            | 125 (34.7)                             | 103 (33.4)      | 22 (42.3)                     |
| Burning                                          | 93 (25.8)                              | 66 (21.4)       | 27 (51.9)                     |
| Cracked skin                                     | 84 (23.3)                              | 66 (21.4)       | 18 (34.6)                     |
| Tender/painful skin                              | 61 (16.9)                              | 44 (14.3)       | 17 (32.7)                     |
| Stinging                                         | 59 (16.4)                              | 46 (14.9)       | 13 (25.0)                     |
| Tightness                                        | 55 (15.3)                              | 40 (13.0)       | 15 (28.8)                     |
| Nail pitting or deformation                      | 36 (10.0)                              | 24 (7.8)        | 12 (23.1)                     |
| <b>Number of current areas affected, mean±SD</b> | 1.6±1.8                                | 1.3±1.4         | 3.5±2.6                       |
| <b>Current areas affected, n (%)</b>             |                                        |                 |                               |
| Knees                                            | 100 (27.8)                             | 76 (24.7)       | 24 (46.2)                     |
| Scalp                                            | 89 (24.7)                              | 73 (23.7)       | 16 (30.8)                     |
| Elbows                                           | 77 (21.4)                              | 55 (17.9)       | 22 (42.3)                     |
| Legs                                             | 54 (15.0)                              | 34 (11.0)       | 20 (38.5)                     |
| Back                                             | 46 (12.8)                              | 25 (8.1)        | 21 (40.4)                     |
| Chest                                            | 42 (11.7)                              | 29 (9.4)        | 13 (25.0)                     |
| Arms                                             | 28 (7.8)                               | 14 (4.5)        | 14 (26.9)                     |
| Groin or genitals                                | 28 (7.8)                               | 16 (5.2)        | 12 (23.1)                     |
| Buttocks                                         | 28 (7.8)                               | 14 (4.5)        | 14 (26.9)                     |
| Nails                                            | 21 (5.8)                               | 14 (4.5)        | 7 (13.5)                      |

\*Only one patient had severe disease at sampling. Only the 10 most common symptoms areas affected are displayed. BSA, Body Surface Area; N, total number of patients per group; n, number of patients with

outcome; PASI, Psoriasis Area and Severity Index; PGA, Physician's Global Assessment; SD, standard deviation.

### Supplementary Table SIII

**Table SIII: Clinical characteristics of the subset of patients at sampling by physician type, overall and by physician-judged disease severity at sampling (Analysis 1).**

| Characteristic                  | Physician-judged severity (Analysis 1) |                       |                      |
|---------------------------------|----------------------------------------|-----------------------|----------------------|
|                                 | Overall                                | Mild                  | Moderate to severe*  |
| <b>Dermatologists</b>           | <b>(N=238)</b>                         | <b>(N=200, 84.0%)</b> | <b>(N=38, 16.0%)</b> |
| <b>Current BSA</b>              | <b>(N=223)</b>                         | <b>(N=186)</b>        | <b>(N=37)</b>        |
| BSA%, mean±SD                   | 2.8±4.4                                | 1.9±3.3               | 7.6±5.8              |
| BSA >10, n (%)                  | 13 (5.8)                               | 3 (1.6)               | 10 (27.0)            |
| <b>Current PGA score, n (%)</b> |                                        |                       |                      |
| PGA 0–1                         | 161 (67.6)                             | 156 (78.0)            | 5 (13.2)             |
| PGA 2–4                         | 77 (32.4)                              | 44 (22.0)             | 33 (86.8)            |
| <b>Current PASI score</b>       | <b>(N=206)</b>                         | <b>(N=174)</b>        | <b>(N=32)</b>        |
| PASI, mean±SD                   | 2.1±3.1                                | 1.3±1.7               | 6.6±4.8              |
| PASI >10, n (%)                 | 6 (2.9)                                | 0 (0.0)               | 6 (18.8)             |
| <b>Paediatricians</b>           | <b>(N=34)</b>                          | <b>(N=27, 79.4%)</b>  | <b>(N=7, 20.6%)</b>  |
| <b>Current BSA</b>              |                                        |                       |                      |
| BSA%, mean±SD                   | 6.3±5.0                                | 5.2±3.0               | 10.4±8.7             |
| BSA >10, n (%)                  | 2 (5.9)                                | 1 (3.7)               | 1 (14.3)             |
| <b>Current PGA score, n (%)</b> |                                        |                       |                      |
| PGA 1                           | 16 (47.1)                              | 16 (59.3)             | 0 (0.0)              |
| PGA 2–3                         | 18 (52.9)                              | 11 (40.7)             | 7 (100.0)            |
| <b>Current PASI score</b>       | <b>(N=27)</b>                          | <b>(N=21)</b>         | <b>(N=6)</b>         |
| PASI, mean±SD                   | 22.3±18.3                              | 22.3±20.6             | 22.5±7.6             |
| PASI >10, n (%)                 | 22 (81.5)                              | 17 (81.0)             | 5 (83.3)             |
| <b>GP/PCPs</b>                  | <b>(N=88)</b>                          | <b>(N=81, 92.0%)</b>  | <b>(N=7, 8.0%)</b>   |
| <b>Current BSA</b>              | <b>(N=65)</b>                          | <b>(N=60)</b>         | <b>(N=5)</b>         |
| BSA%, mean±SD                   | 3.9±5.9                                | 3.6±5.9               | 6.4±5.9              |
| BSA >10, n (%)                  | 5 (7.7)                                | 4 (6.7)               | 1 (20.0)             |
| <b>Current PGA score, n (%)</b> |                                        |                       |                      |
| 0–1                             | 50 (56.8)                              | 49 (60.5)             | 1 (14.3)             |
| 2–4                             | 38 (43.2)                              | 32 (39.5)             | 6 (85.7)             |
| <b>Current PASI score</b>       | <b>(N=44)</b>                          | <b>(N=39)</b>         | <b>(N=5)</b>         |
| PASI, mean±SD                   | 3.2±5.3                                | 2.4±4.3               | 9.0±8.5              |
| PASI >10, n (%)                 | 4 (9.1)                                | 2 (5.1)               | 2 (40.0)             |

\*Only one patient had severe disease at sampling; this patient was managed by a dermatologist. Where the full number of patients is not available, number of patients per group is indicated within the table (*N*). BSA, Body Surface Area; GP, general practitioner; *N*, total number of patients per group; *n*, number of patients with outcome; PASI, Psoriasis Area and Severity Index; PCP, primary care practitioner; PGA, Physician's Global Assessment; SD, standard deviation.
